# Supplementary material for: Reactivity of boraguanidinato germylenes toward carbonyl compounds and isocyanides: C–O, C–F and C–N bond activation
Source: Royal Society of Chemistry journal article supplement (doi:10.1039/c9dt04839a), 2020-01-01
Supplement: c9dt04839a1.pdf [file c9dt04839a1.pdf]

ESI for:

**Reactivity of Boraguanidinato Germylene Toward Carbonyl Compounds  
and Isocyanides: C-O, C-F and C-N Bond Activation.**

*Jiří Böserle, Milan Erben, Roman Jambor, Aleš Růžička and Libor Dostál\**

\*E-mail: libor.dostal@upce.cz (L.D.)

**Table of contents:**

|                                              |                |
|----------------------------------------------|----------------|
| 1) NMR spectra of studied compounds          | <b>S2-S12</b>  |
| 2) IR and Raman spectra of studied compounds | <b>S13-S16</b> |
| 3) Crystallographic data (Table S1)          | <b>S17-S18</b> |

# 1) NMR spectra of studied compounds.

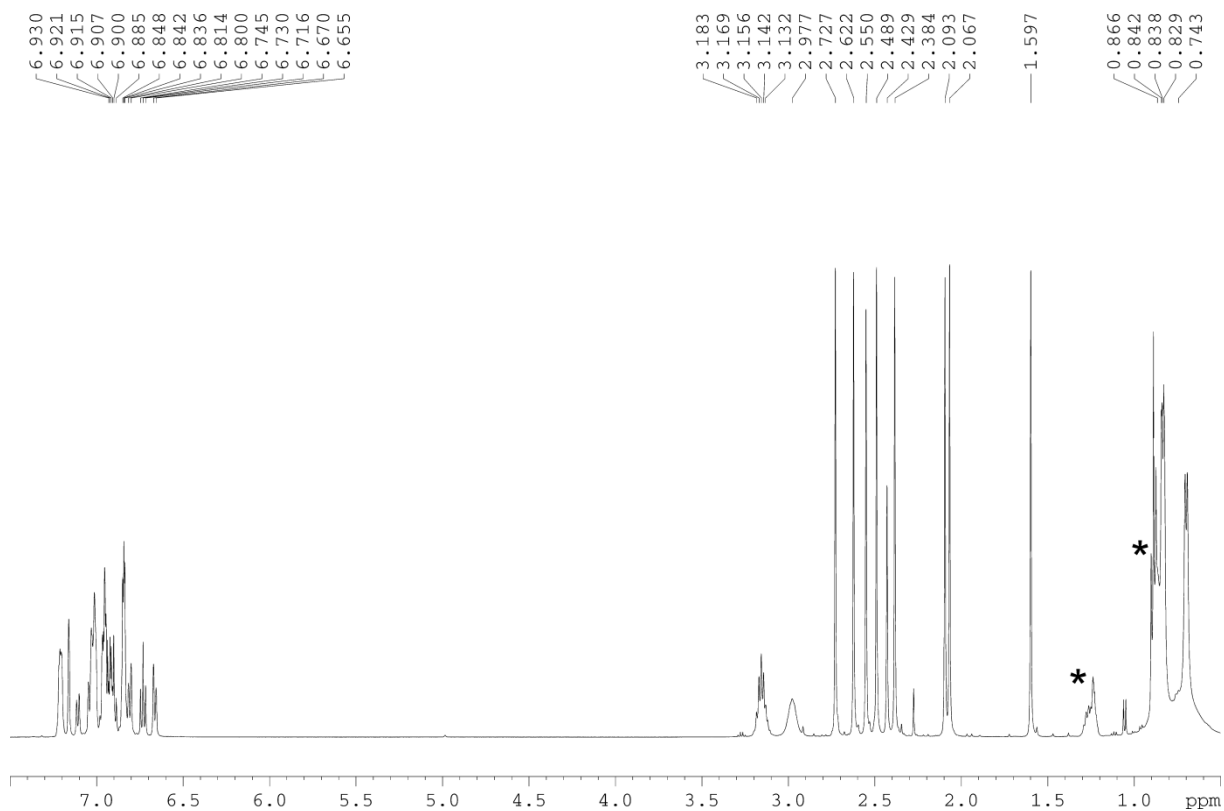

Figure S1:  $^1\text{H}$  NMR spectrum of **2** in  $\text{C}_6\text{D}_6$  (\* traces of hexane).

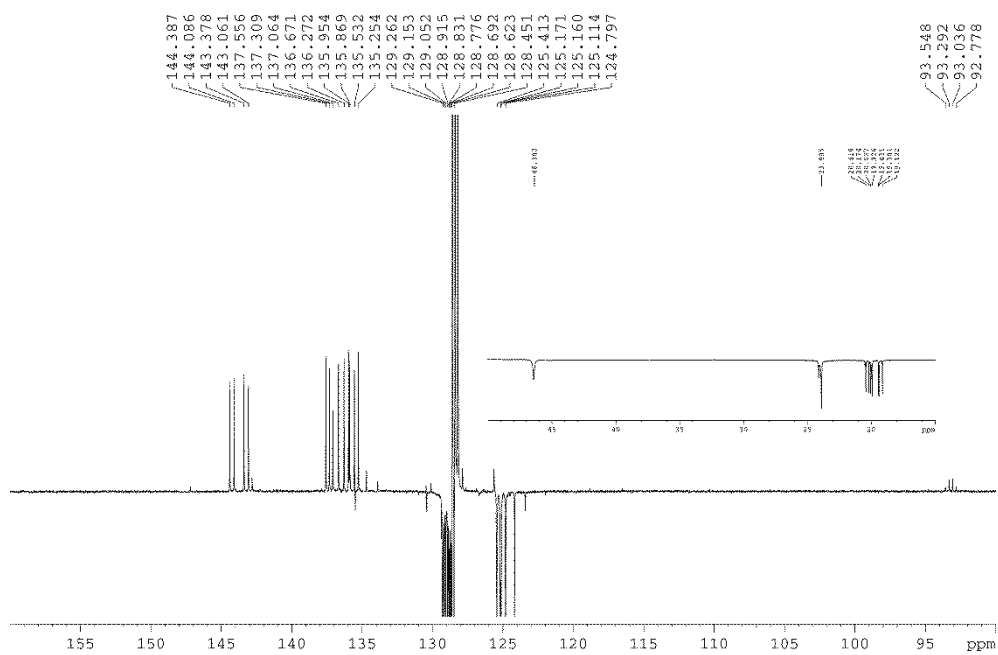

Figure S2:  $^{13}\text{C}\{^1\text{H}\}$  NMR spectrum of **2** in  $\text{C}_6\text{D}_6$ .

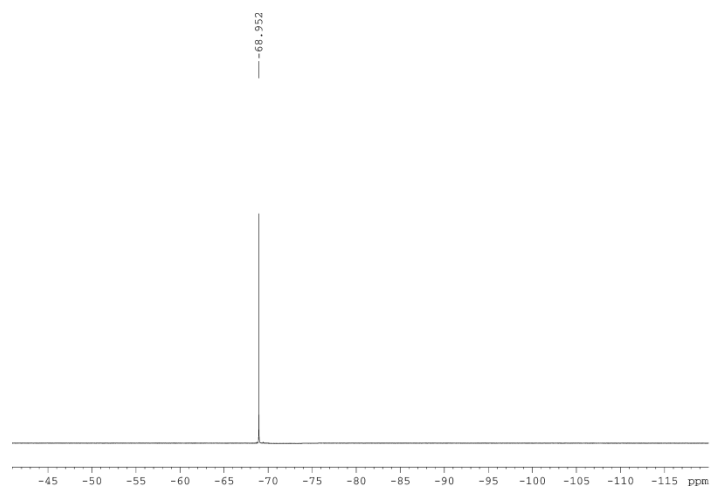

**Figure S3:**  $^{19}\text{F}\{^1\text{H}\}$  NMR spectrum of **2** in  $\text{C}_6\text{D}_6$ .

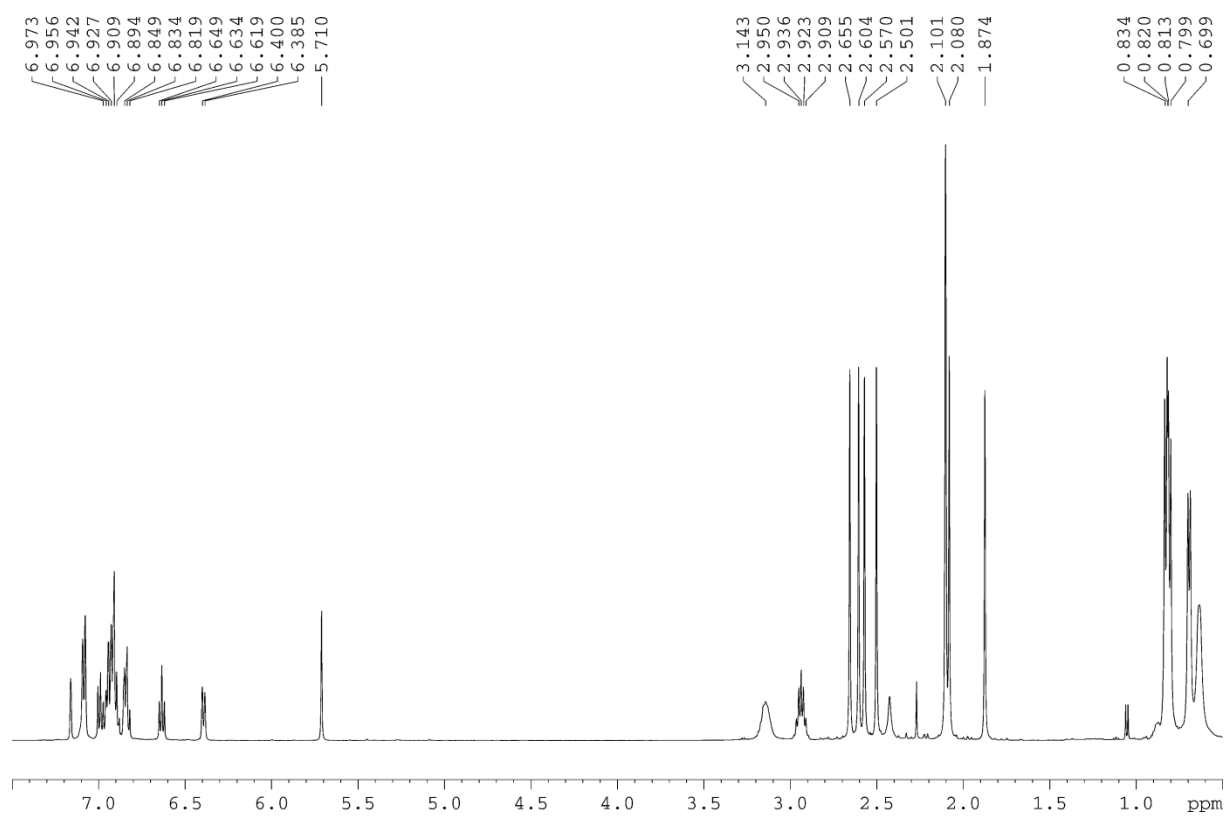

**Figure S4:**  $^1\text{H}$  NMR spectrum of **3** in  $\text{C}_6\text{D}_6$ .

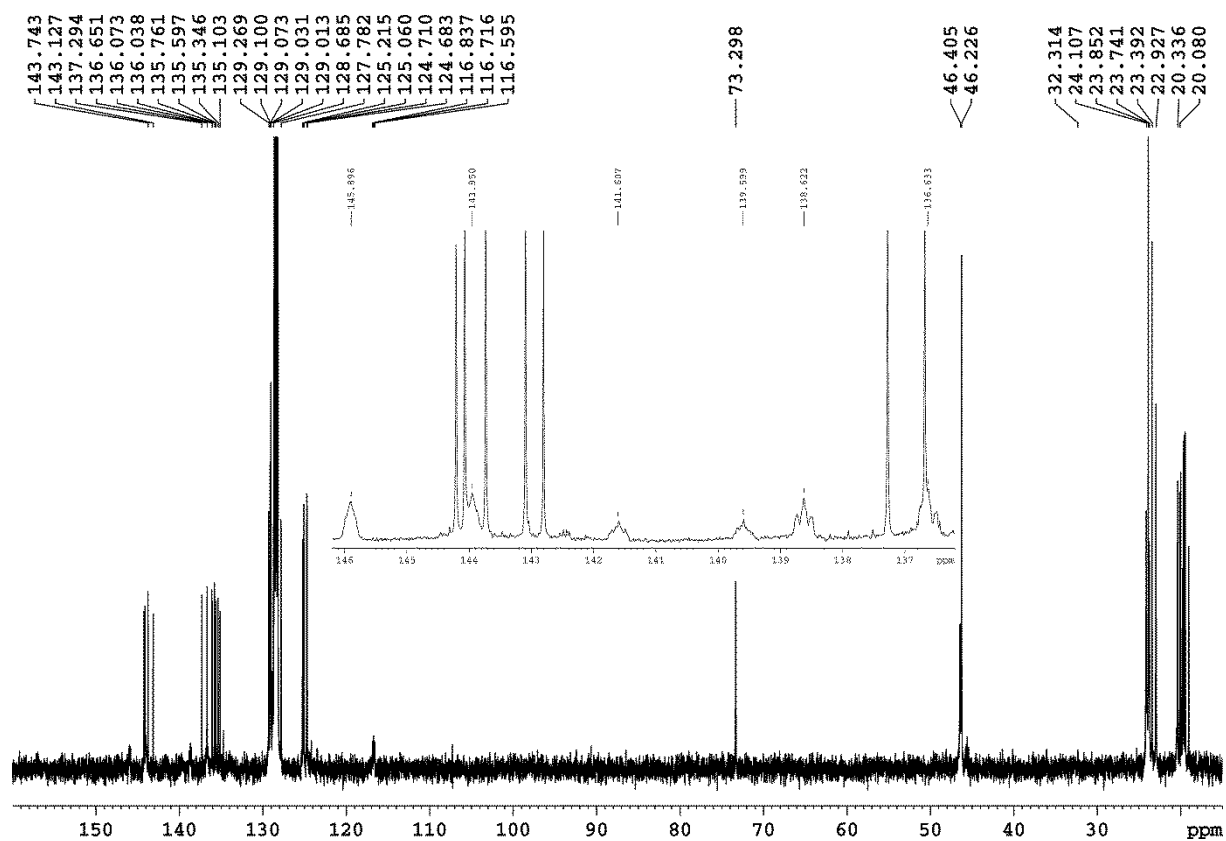

Figure S5:  $^{13}\text{C}\{^1\text{H}\}$  NMR spectrum of **3** in  $\text{C}_6\text{D}_6$ .

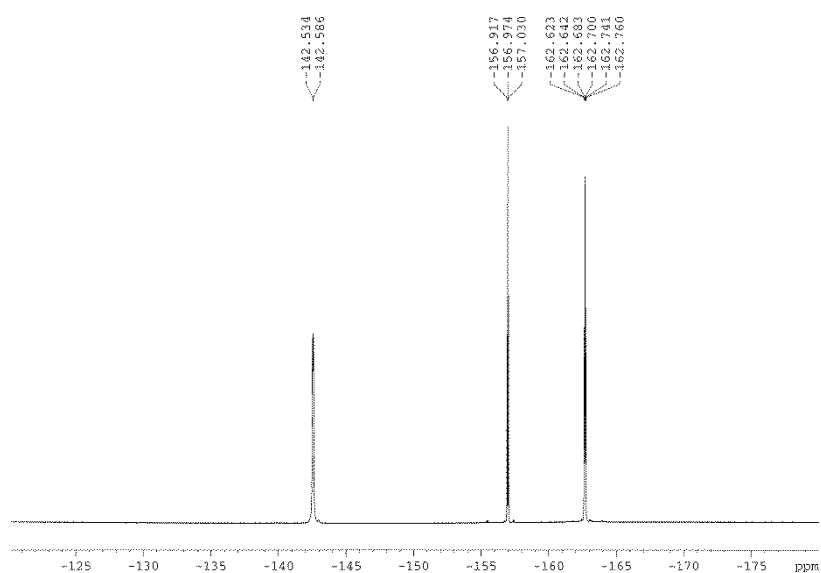

Figure S6:  $^{19}\text{F}\{^1\text{H}\}$  NMR spectrum of **3** in  $\text{C}_6\text{D}_6$ .

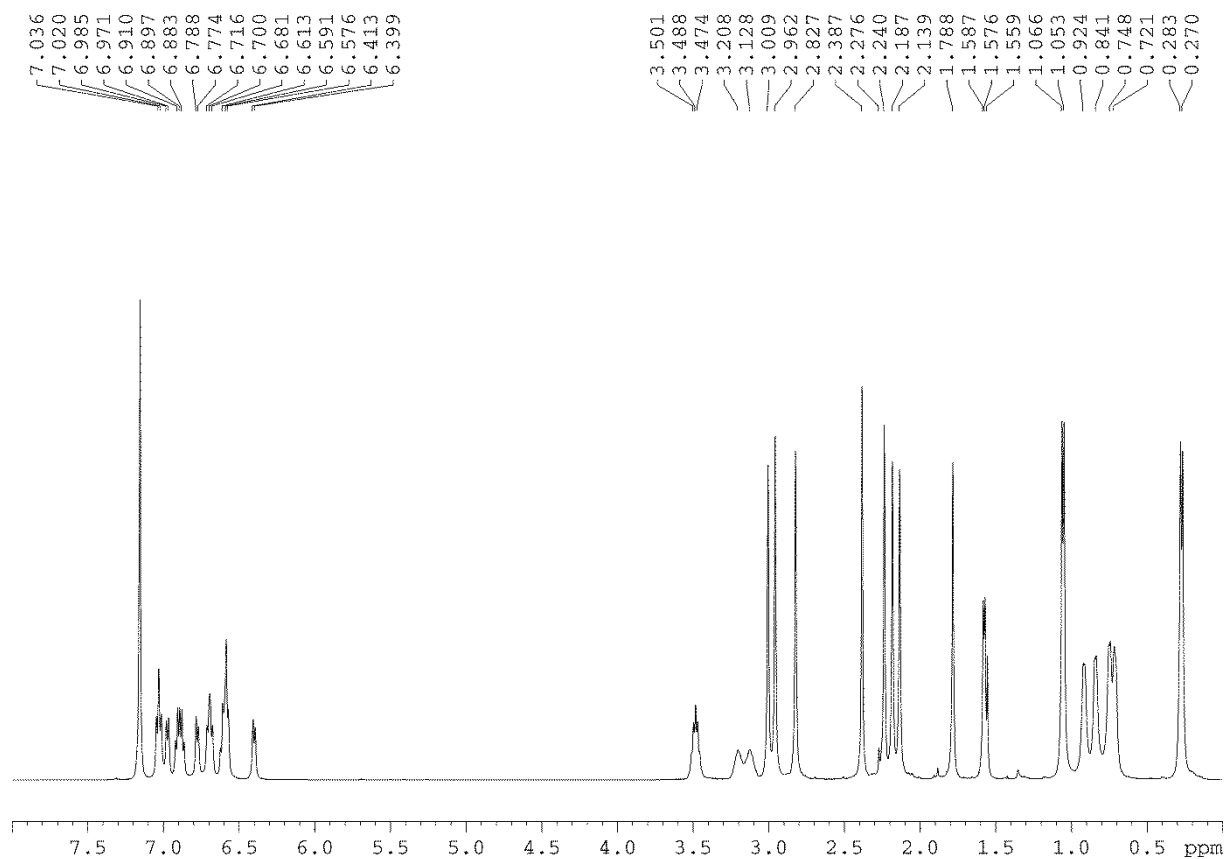

Figure S7:  $^1\text{H}$  NMR spectrum of **4** in  $\text{C}_6\text{D}_6$ .

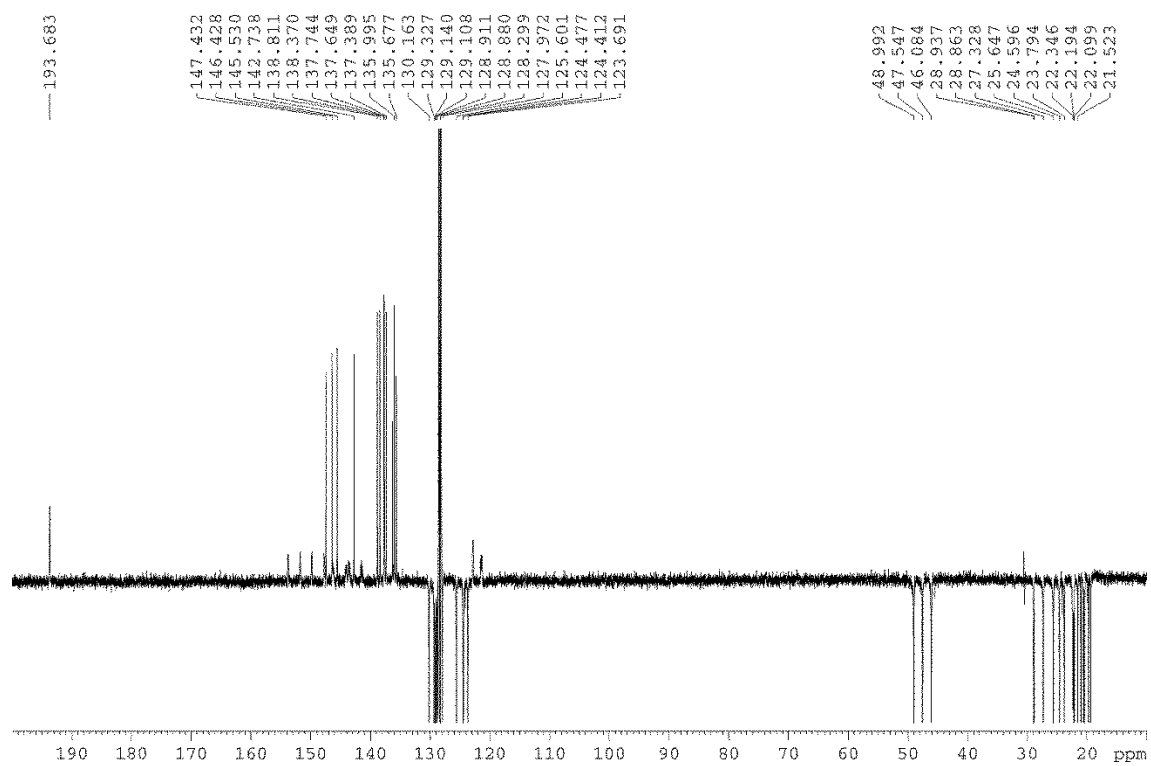

Figure S8:  $^{13}\text{C}\{^1\text{H}\}$  NMR spectrum of **4** in  $\text{C}_6\text{D}_6$ .

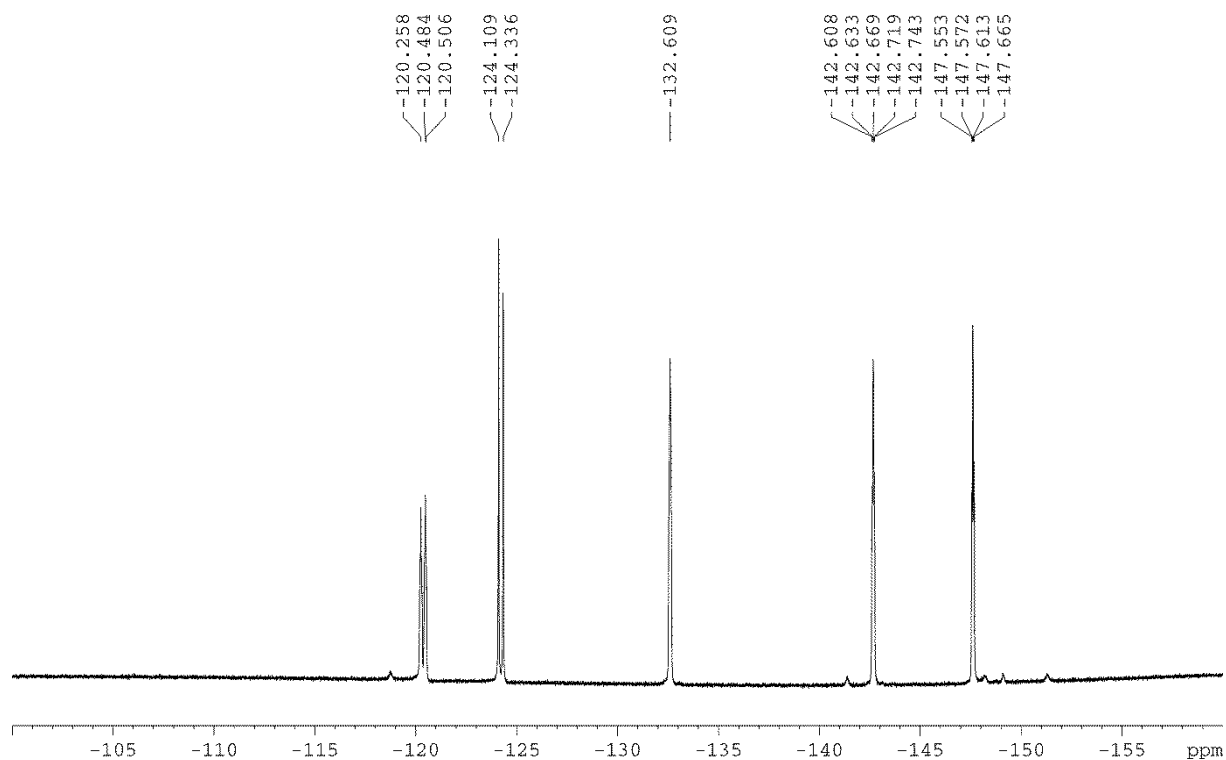

**Figure S9:**  $^{19}\text{F}\{^1\text{H}\}$  NMR spectrum of **4** in  $\text{C}_6\text{D}_6$ .

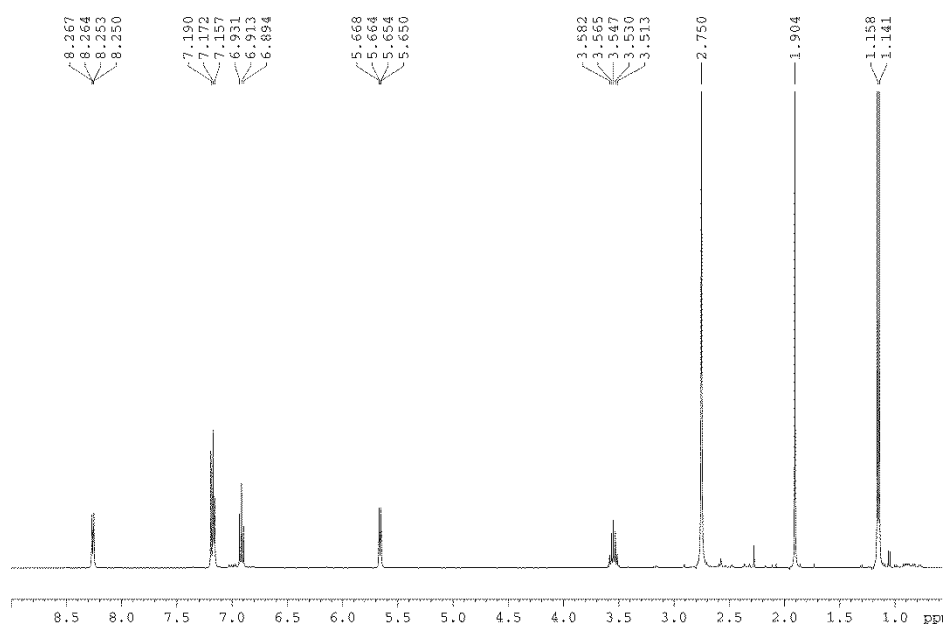

**Figure S10:**  $^1\text{H}$  NMR spectrum of **5** in  $\text{C}_6\text{D}_6$ .

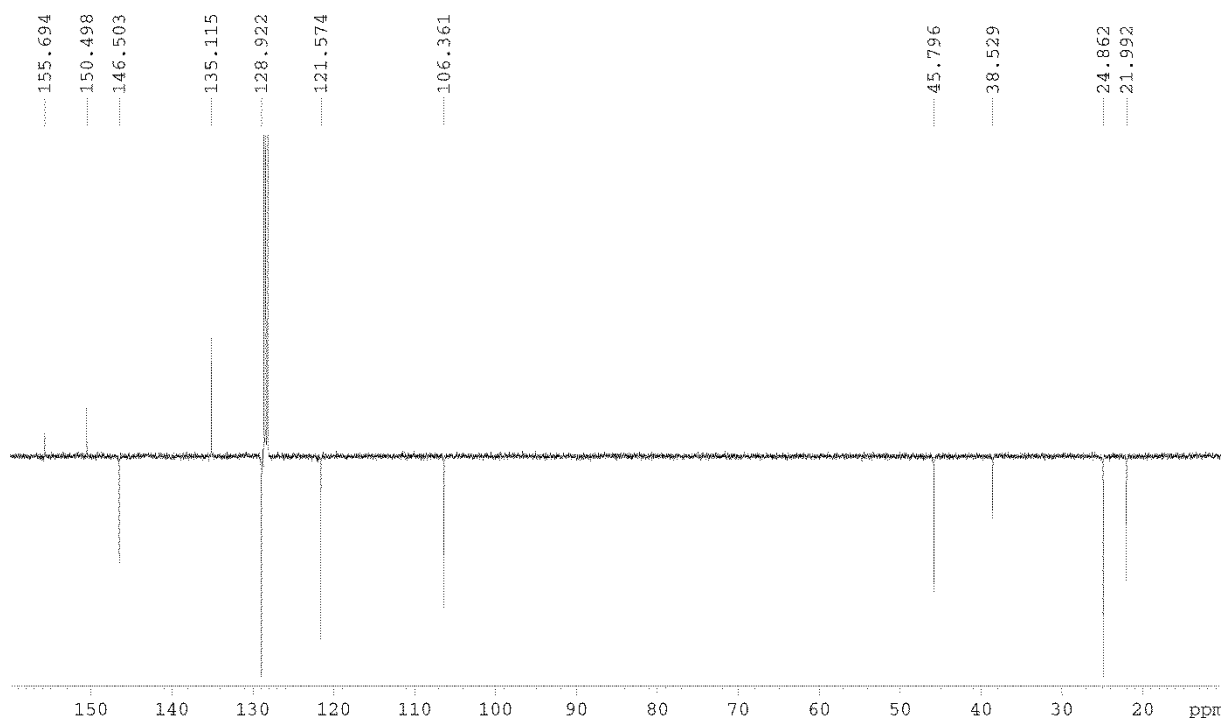

**Figure S11:**  $^{13}\text{C}\{^1\text{H}\}$  NMR spectrum of **5** in  $\text{C}_6\text{D}_6$ .

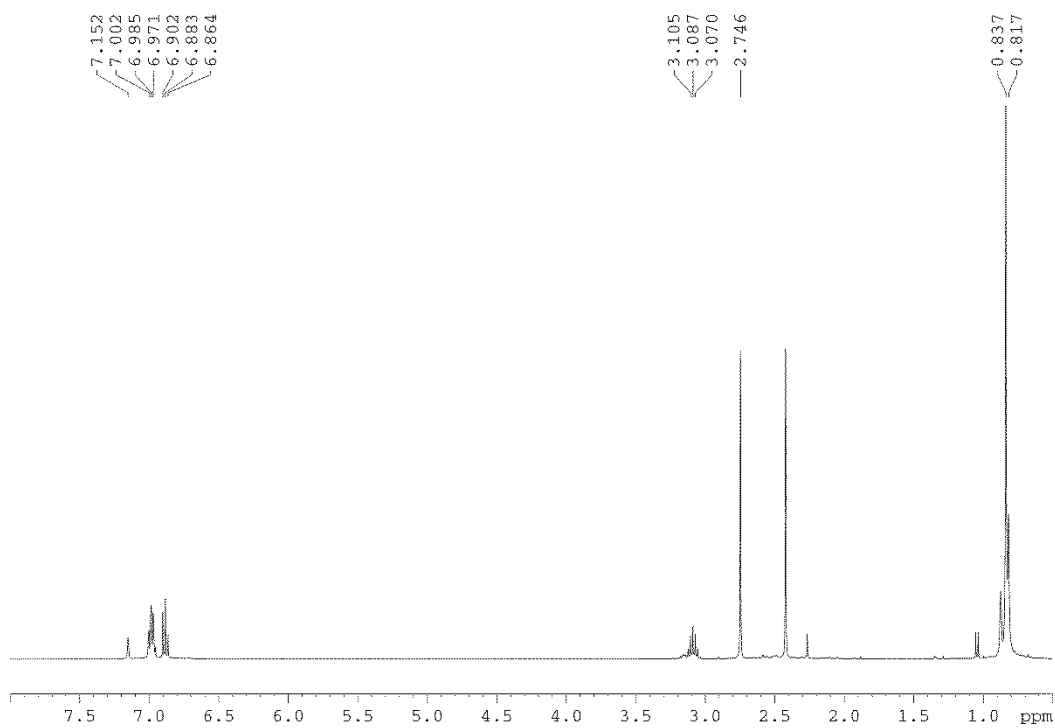

**Figure S12:**  $^1\text{H}$  NMR spectrum of **6** in  $\text{C}_6\text{D}_6$ .

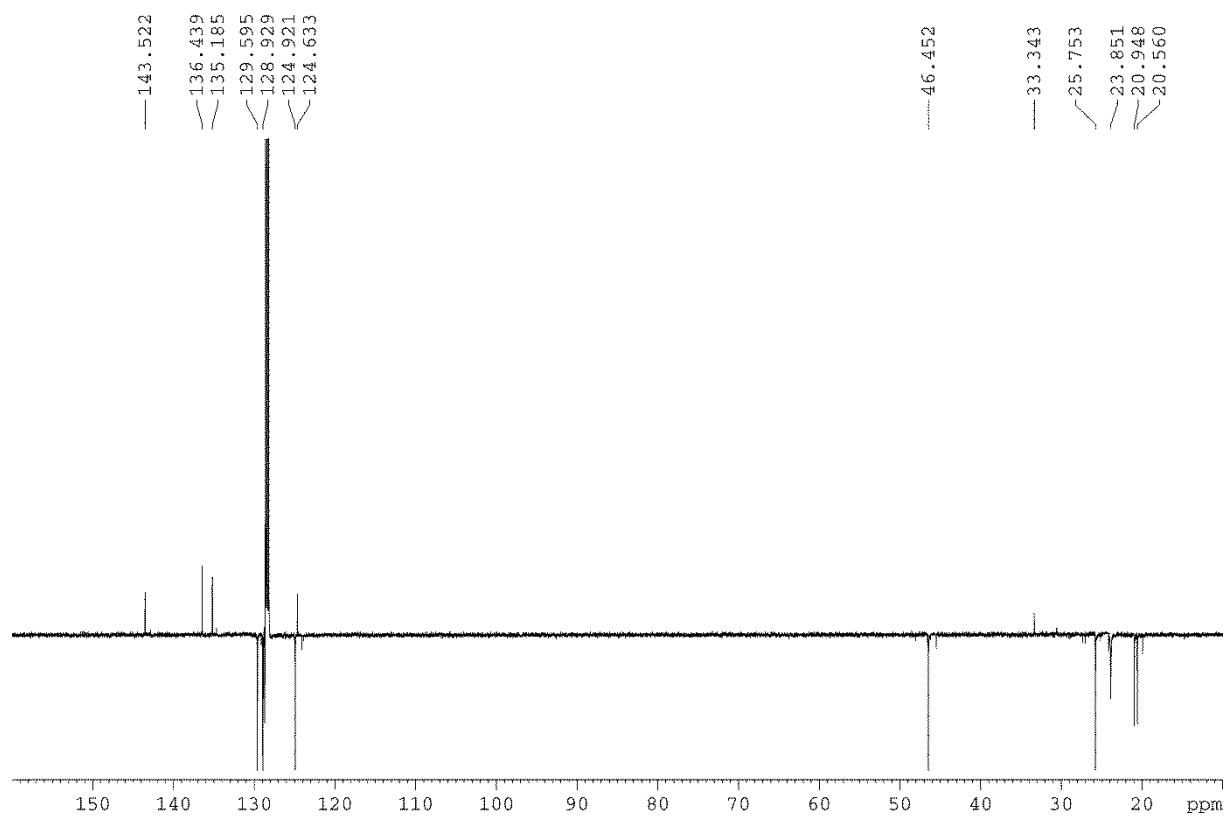

**Figure S13:**  $^{13}\text{C}\{^1\text{H}\}$  NMR spectrum of **6** in  $\text{C}_6\text{D}_6$ .



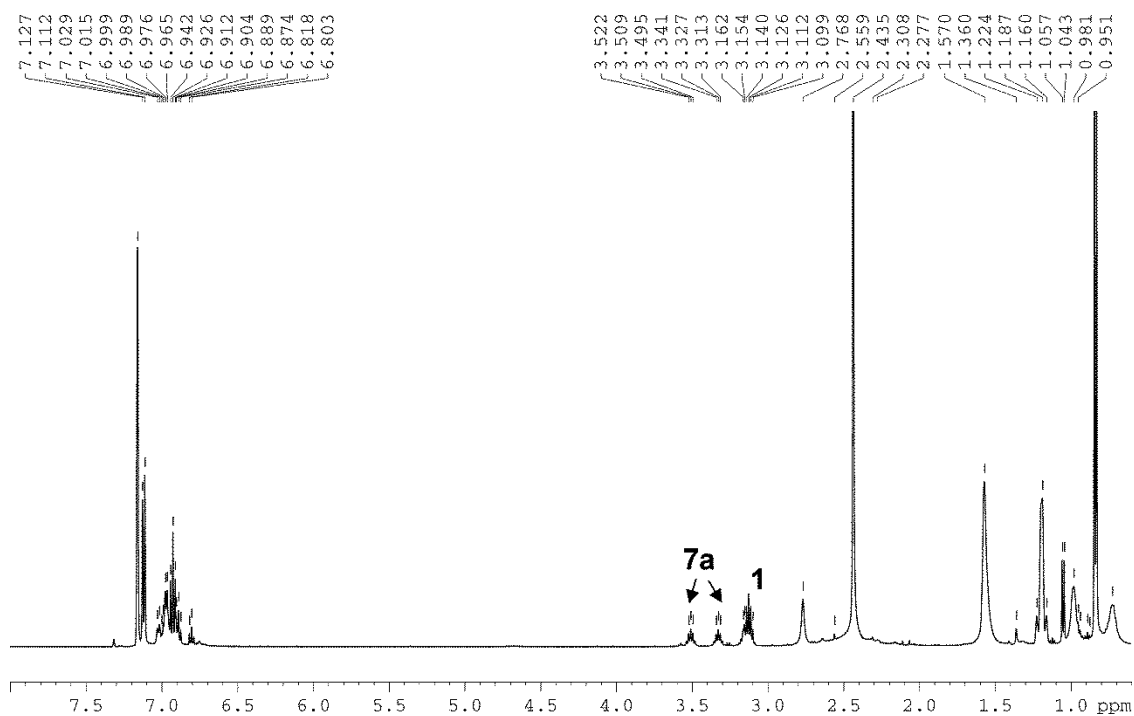

**Figure S14:**  $^1\text{H}$  NMR spectrum of single-crystals of **7** in  $\text{C}_6\text{D}_6$  showing two set of signals assigned to starting **1** proposed complex **7a**.

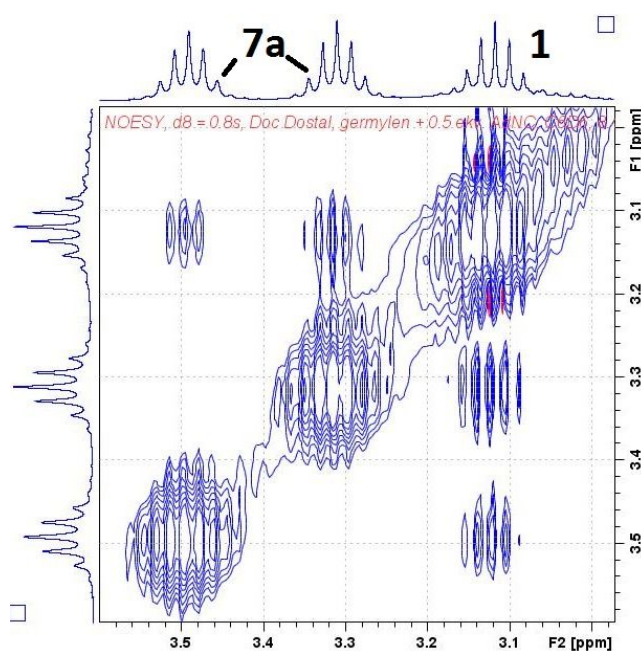

**Figure S15:**  $^1\text{H}$ ,  $^1\text{H}$  EXSY NMR spectrum of single-crystals of **7** in  $\text{C}_6\text{D}_6$  (region of  $\text{NCH}(\text{CH}_3)_2$  group) showing mutual dynamic exchange between starting **1** and proposed complex **7a**.

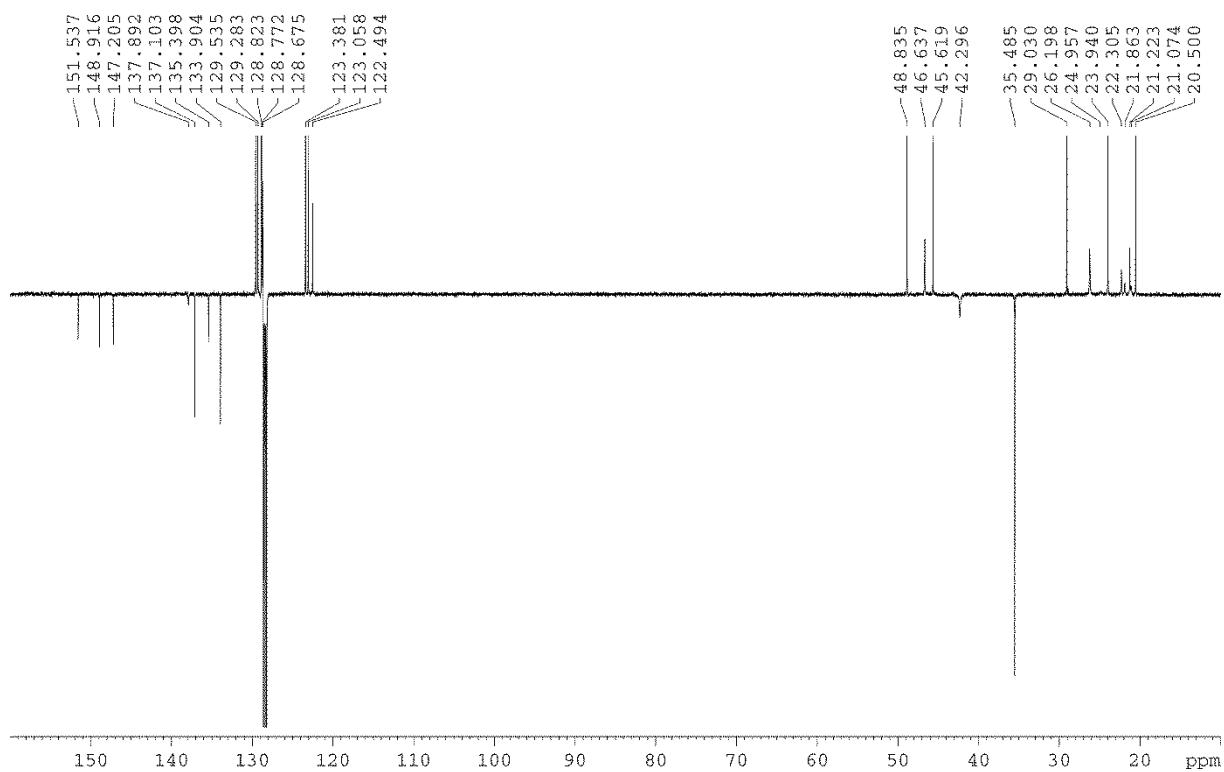

**Figure S16:**  $^{13}\text{C}\{^1\text{H}\}$  NMR spectrum of single-crystals of **7** in  $\text{C}_6\text{D}_6$  showing two set of signals assigned to starting **1** proposed complex **7a**.

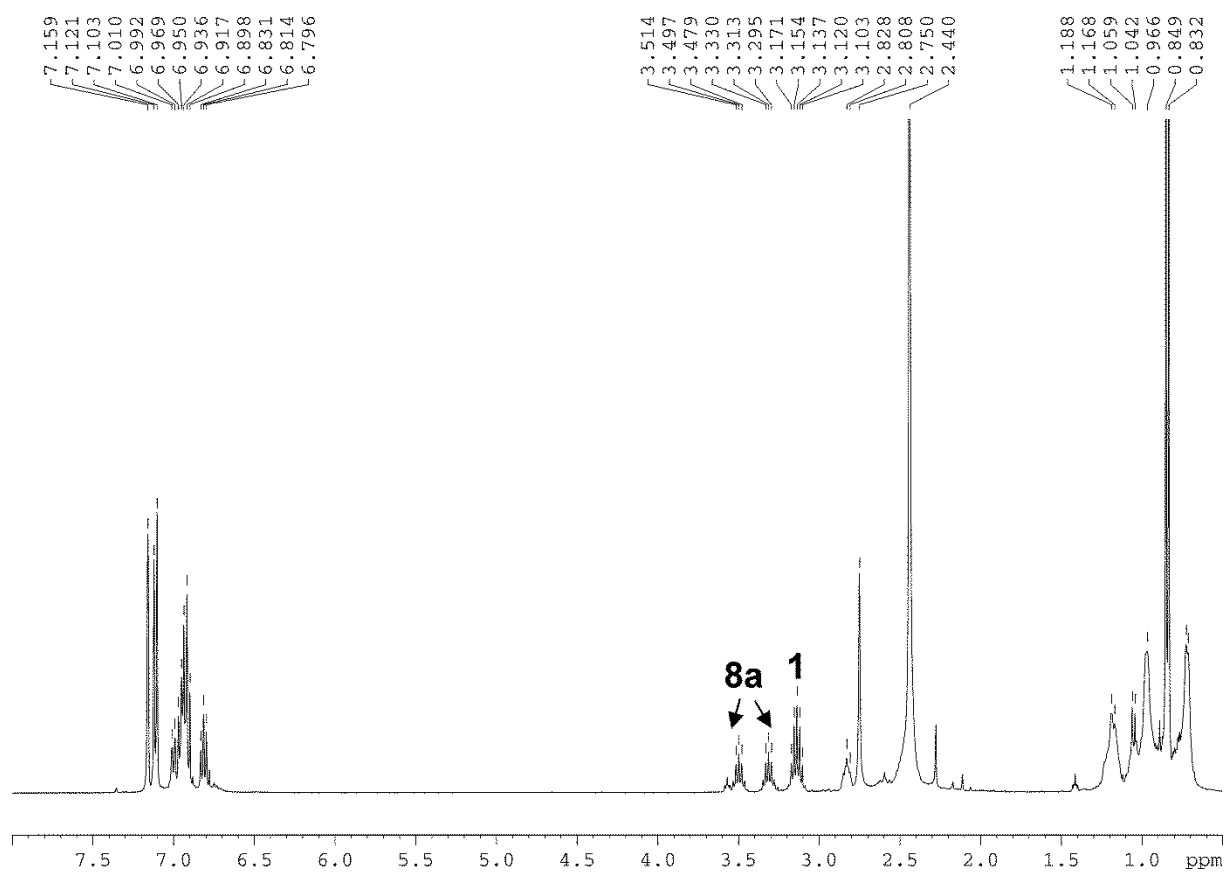

**Figure S17:**  $^1\text{H}$  NMR spectrum of single-crystals of **8** in  $\text{C}_6\text{D}_6$  showing two set of signals assigned to starting **1** proposed complex **8a**.

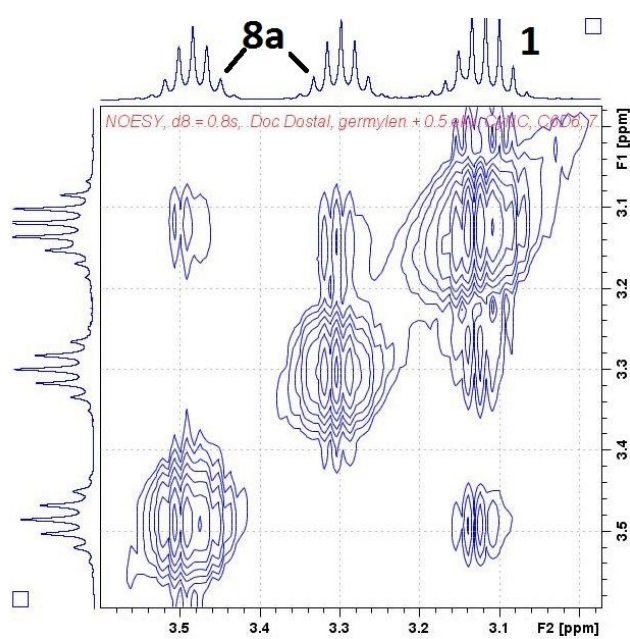

**Figure S18:**  $^1\text{H}$ ,  $^1\text{H}$  EXSY NMR spectrum of single-crystals of **8** in  $\text{C}_6\text{D}_6$  (region of  $\text{NCH}(\text{CH}_3)_2$  group) showing mutual dynamic exchange between starting **1** and proposed complex **8a**.

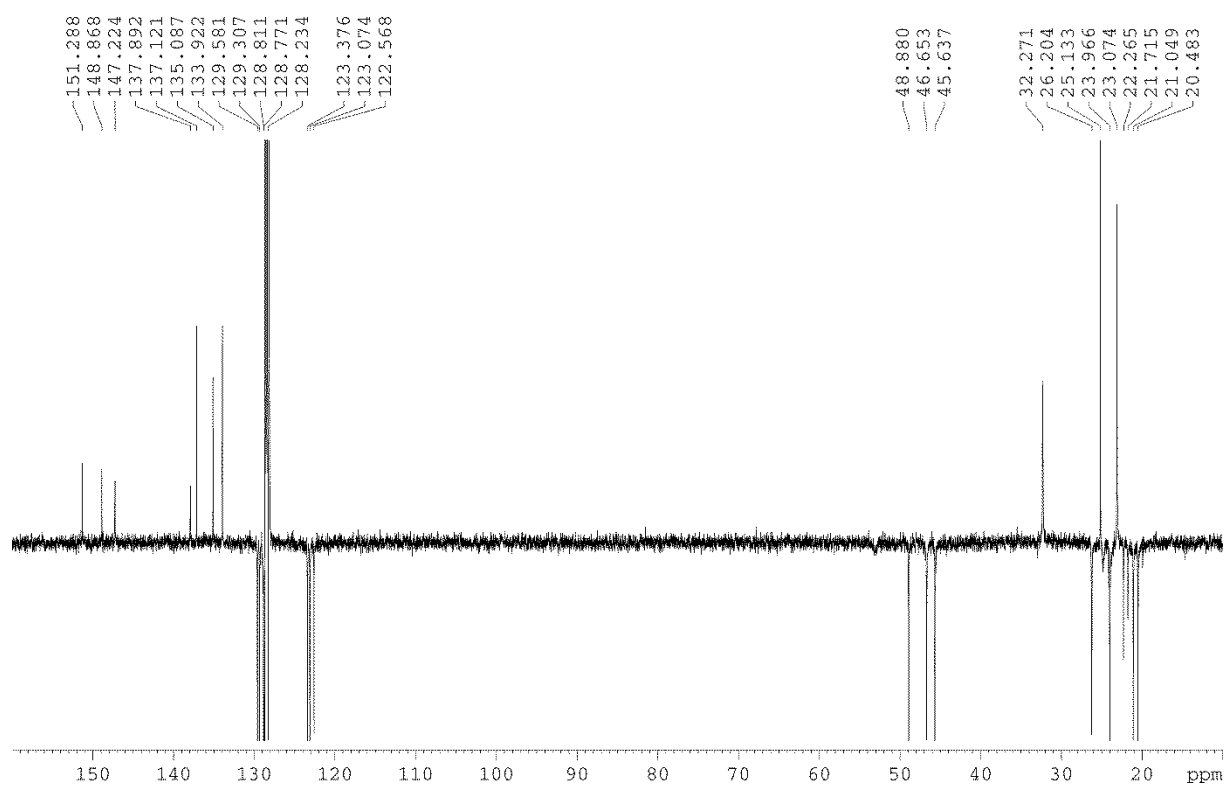

**Figure S19:**  $^{13}\text{C}\{^1\text{H}\}$  NMR spectrum of single-crystals of **8** in  $\text{C}_6\text{D}_6$  showing two set of signals assigned to starting **1** proposed complex **8a**.

## 2) IR and Raman spectra of studied compounds.

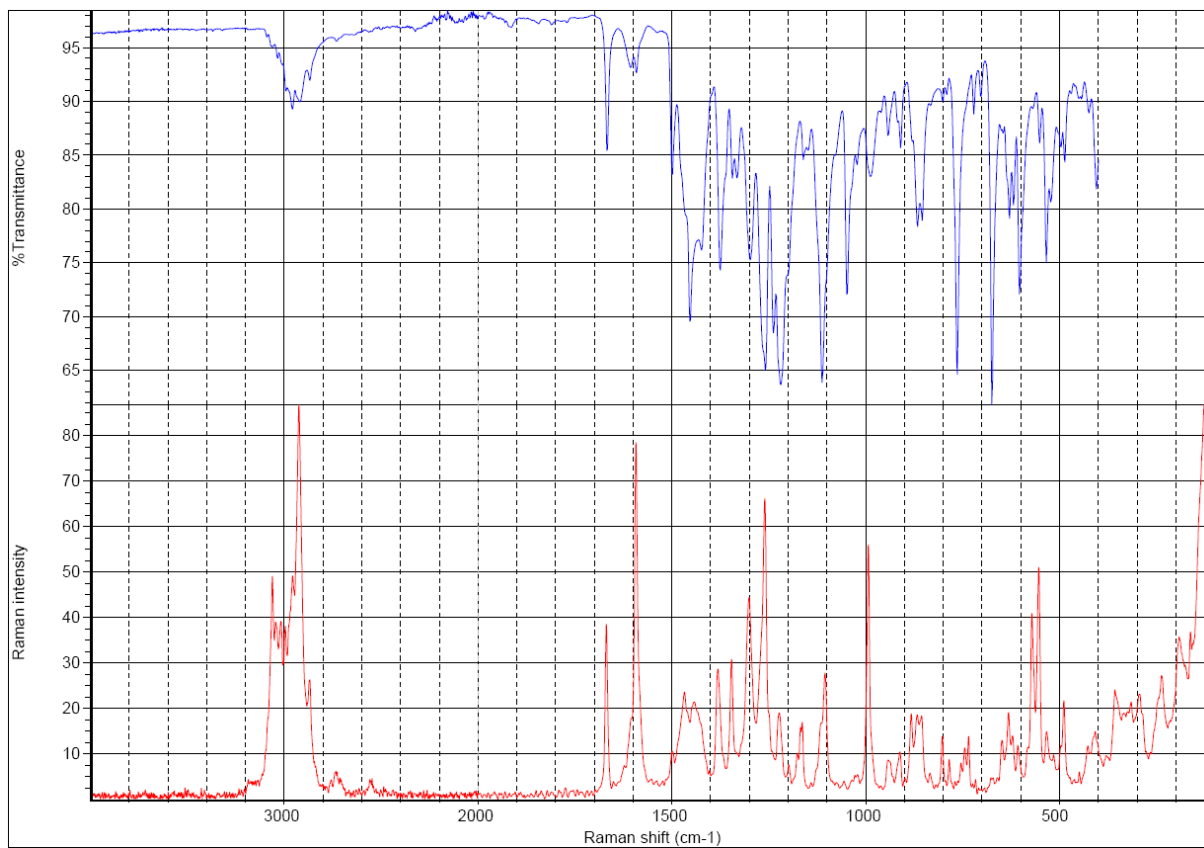

**Figure S20:** IR (top) and Raman (bottom) spectra of solid **4**.

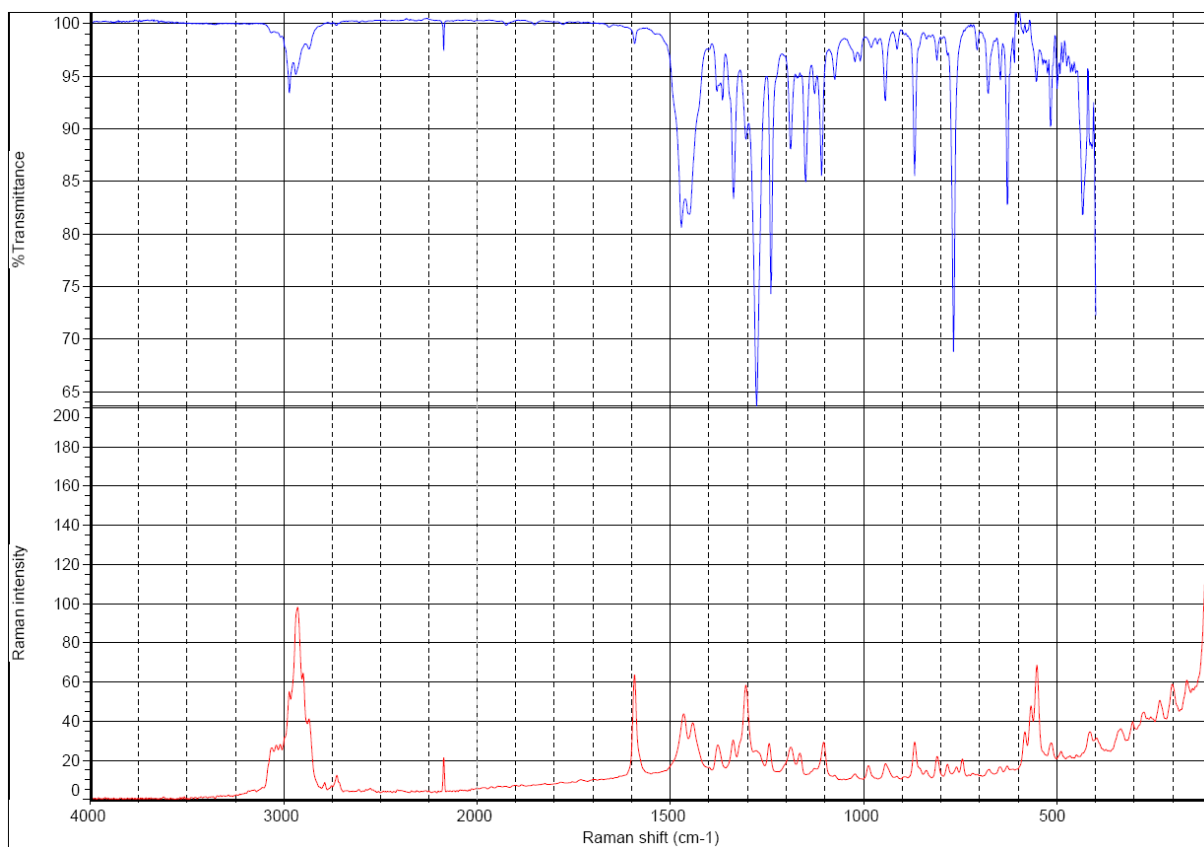

**Figure S21:** IR (top) and Raman (bottom) spectra of solid **6**.

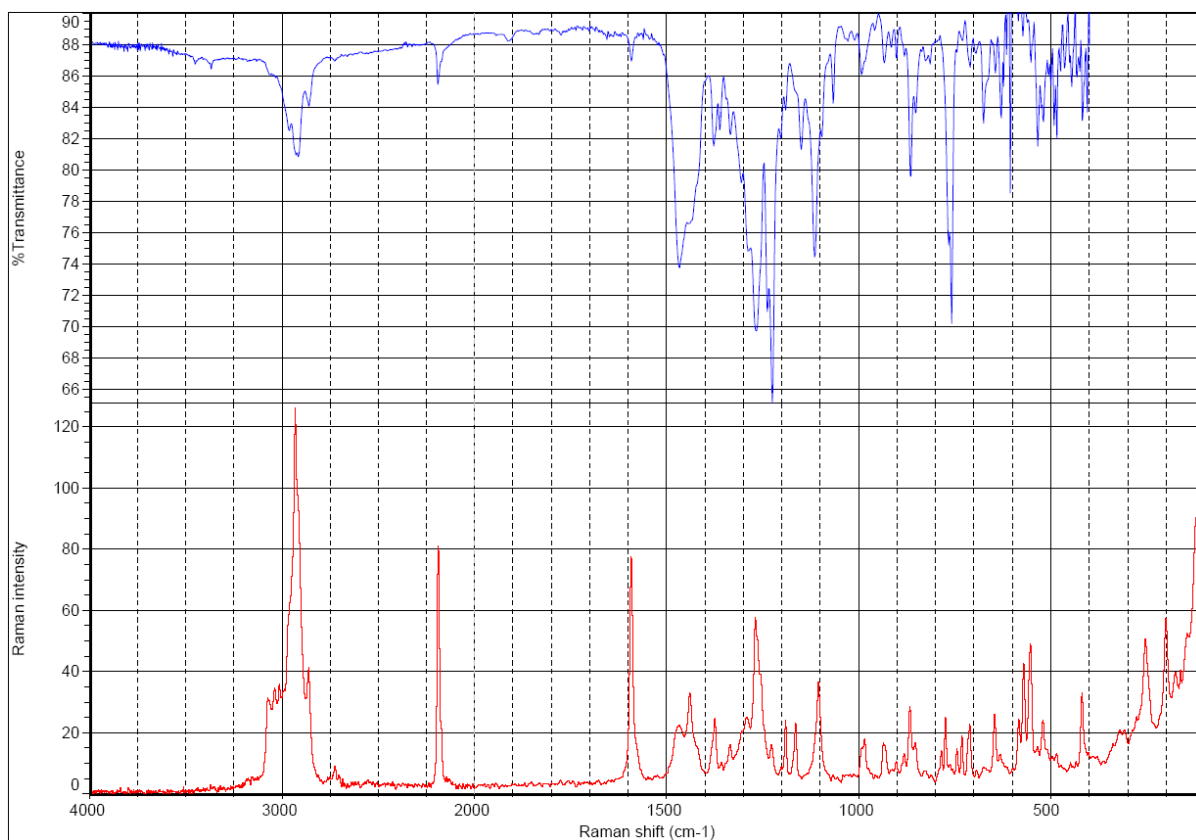

**Figure S22:** IR (top) and Raman (bottom) spectra of solid 7.

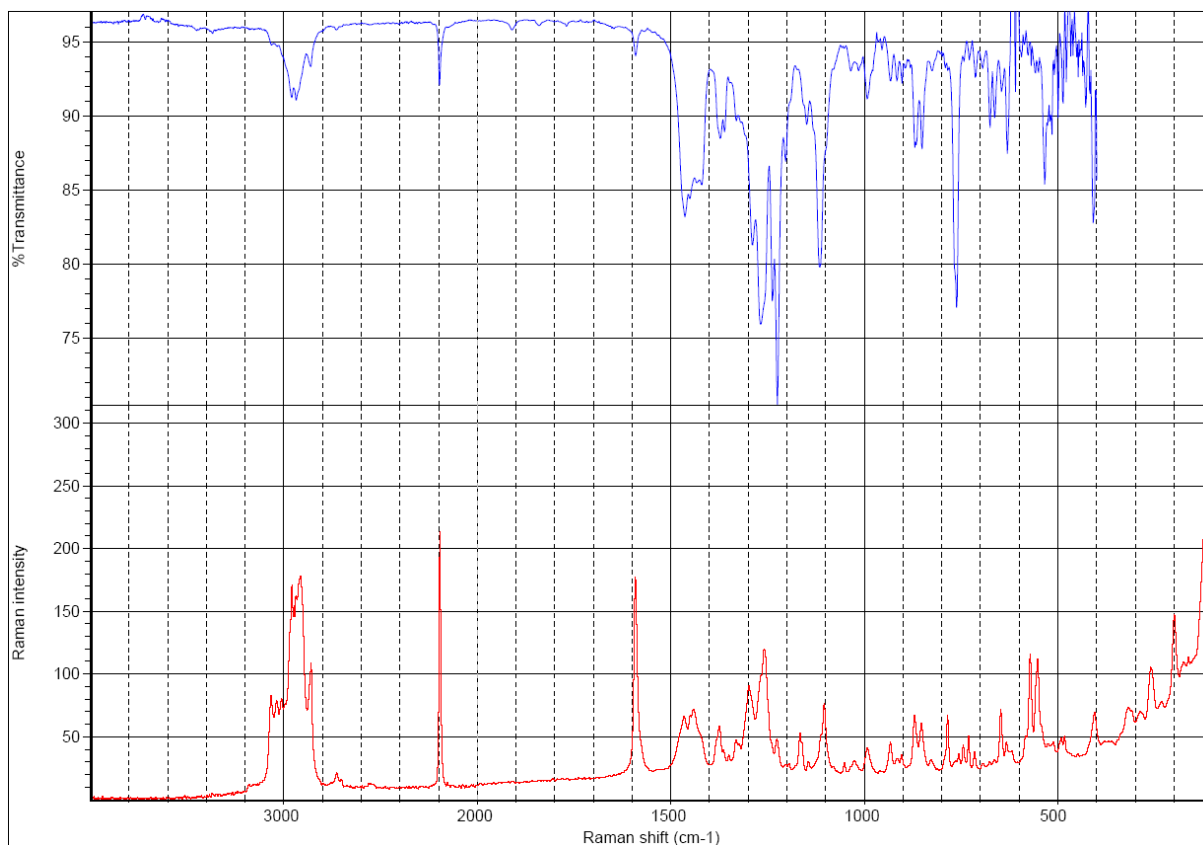

**Figure S23:** IR (top) and Raman (bottom) spectra of solid **8**.



### 3) Crystallographic data.

**Table S1.** Relevant crystallographic data for the studied compounds.

|                                                             | 2                                                                                                                                  | 4                                                                                              | 5                                                   |
|-------------------------------------------------------------|------------------------------------------------------------------------------------------------------------------------------------|------------------------------------------------------------------------------------------------|-----------------------------------------------------|
| chemical formula                                            | C <sub>52</sub> H <sub>69</sub> B <sub>2</sub> F <sub>3</sub> Ge <sub>2</sub> N <sub>6</sub> O.0.5(C <sub>6</sub> H <sub>6</sub> ) | C <sub>67</sub> H <sub>82</sub> B <sub>2</sub> F <sub>5</sub> Ge <sub>2</sub> N <sub>6</sub> O | C <sub>29</sub> H <sub>42</sub> BGeN <sub>5</sub>   |
| Cryst syst                                                  | monoclinic                                                                                                                         | Triclinic                                                                                      | monoclinic                                          |
| Space group                                                 | <i>P2<sub>1</sub>/c</i>                                                                                                            | <i>P-1</i>                                                                                     | <i>P2<sub>1</sub>/c</i>                             |
| <i>a</i> [Å]                                                | 13.3959(8)                                                                                                                         | 13.2217(10)                                                                                    | 16.9688(11)                                         |
| <i>b</i> [Å]                                                | 10.9681(6)                                                                                                                         | 13.5451(11)                                                                                    | 11.0690(6)                                          |
| <i>c</i> [Å]                                                | 19.050(2)                                                                                                                          | 20.1024(15)                                                                                    | 15.7622(13)                                         |
| $\alpha$ [°]                                                | 90                                                                                                                                 | 78.791(2)                                                                                      | 90                                                  |
| $\beta$ [°]                                                 | 100.283(7)                                                                                                                         | 74.532(2)                                                                                      | 102.325(6)                                          |
| $\gamma$ [°]                                                | 90                                                                                                                                 | 66.824(2)                                                                                      | 90                                                  |
| <i>Z</i>                                                    | 4                                                                                                                                  | 2                                                                                              | 4                                                   |
| $\mu$ [mm <sup>-1</sup> ]                                   | 1.133                                                                                                                              | 1.009                                                                                          | 1.085                                               |
| <i>D<sub>x</sub></i> [Mg m <sup>-3</sup> ]                  | 1.218                                                                                                                              | 1.307                                                                                          | 1.249                                               |
| Cryst size [mm]                                             | 0.59×0.51×0.39                                                                                                                     | 0.29×0.20×0.19                                                                                 | 0.37×0.19×0.13                                      |
| $\theta$ range, [deg]                                       | 1-27                                                                                                                               | 1-27.5                                                                                         | 1-27.5                                              |
| <i>T<sub>min</sub></i> , <i>T<sub>max</sub></i>             | 0.635, 0.763                                                                                                                       | 0.5596, 0.7456                                                                                 | 0.797, 0.900                                        |
| no. of reflns measd                                         | 24 311                                                                                                                             | 120 008                                                                                        | 29 521                                              |
| no. of unique reflns, <i>R<sub>int</sub></i>                | 5924, 0.029                                                                                                                        | 14674, 0.035                                                                                   | 6529, 0.033                                         |
| no. of obsd reflns                                          | 5027                                                                                                                               | 12670                                                                                          | 5274                                                |
| no. of params                                               | 298                                                                                                                                | 763                                                                                            | 325                                                 |
| <i>S</i> all data                                           | 1.111                                                                                                                              | 1.038                                                                                          | 1.115                                               |
| final <i>R</i> indices [ <i>I</i> >2 $\sigma$ ( <i>I</i> )] | 0.033                                                                                                                              | 0.042                                                                                          | 0.034                                               |
| w <i>R</i> 2 indices (all data)                             | 0.074                                                                                                                              | 0.098                                                                                          | 0.065                                               |
| $\Delta\rho$ , max., min. [e Å <sup>-3</sup> ]              | 0.406, -0.443                                                                                                                      | 0.837, -0.676                                                                                  | 0.308, -0.362                                       |
| Diffractometer                                              | Bruker D8 - Venture                                                                                                                | Bruker D8 - Venture                                                                            | Bruker Nonius KappaCCD area detector                |
| Absorption correction                                       | Multi-scan; <i>SADABS2016/2</i> - Bruker AXS area detector scaling and absorption correction.                                      | Multi-scan; <i>SADABS2016/2</i> - Bruker AXS area detector scaling and absorption correction   | Integration<br>Gaussian integration (Coppens, 1970) |

Definitions:  $R_{\text{int}} = \sum |F_o^2 - F_{o,\text{mean}}^2| / \sum F_o^2$ ,  $S = [\sum (w(F_o^2 - F_c^2)^2) / (N_{\text{diffs}} - N_{\text{params}})]^{1/2}$  for all data,  $R(F) = \sum ||F_o| - |F_c|| / \sum |F_o|$  for observed data,  $wR(F^2) = [\sum (w(F_o^2 - F_c^2)^2) / (\sum w(F_o^2)^2)]^{1/2}$  for all data.

**Table S1 (continuation).** Relevant crystallographic data for the studied compounds.

|                                                    | <b>6</b>                                               | <b>7</b>                                                                      | <b>8</b>                                                                      |
|----------------------------------------------------|--------------------------------------------------------|-------------------------------------------------------------------------------|-------------------------------------------------------------------------------|
| chemical formula                                   | C <sub>27</sub> H <sub>41</sub> BGeN <sub>4</sub>      | C <sub>55</sub> H <sub>79</sub> B <sub>2</sub> Ge <sub>2</sub> N <sub>7</sub> | C <sub>51</sub> H <sub>74</sub> B <sub>2</sub> Ge <sub>2</sub> N <sub>7</sub> |
| Cryst syst                                         | monoclinic                                             | monoclinic                                                                    | monoclinic                                                                    |
| Space group                                        | <i>P2<sub>1</sub>/c</i>                                | <i>P2<sub>1</sub>/c</i>                                                       | <i>P2<sub>1</sub>/c</i>                                                       |
| <i>a</i> [Å]                                       | 17.935(4)                                              | 14.1030(17)                                                                   | 16.2361(11)                                                                   |
| <i>b</i> [Å]                                       | 13.777(3)                                              | 22.561(2)                                                                     | 14.0029(13)                                                                   |
| <i>c</i> [Å]                                       | 22.017(4)                                              | 18.1100(18)                                                                   | 23.556(3)                                                                     |
| α[°]                                               | 90                                                     | 90                                                                            | 90                                                                            |
| β[°]                                               | 95.854(8)                                              | 112.285(6)                                                                    | 106.592(7)                                                                    |
| γ[°]                                               | 90                                                     | 90                                                                            | 90                                                                            |
| <i>Z</i>                                           | 4                                                      | 4                                                                             | 4                                                                             |
| μ[mm <sup>-1</sup> ]                               | 1.164                                                  | 1.170                                                                         | 1.211                                                                         |
| <i>D<sub>x</sub></i> [Mg m <sup>-3</sup> ]         | 1.297                                                  | 1.252                                                                         | 1.232                                                                         |
| Cryst size [mm]                                    | 0.60×0.54×0.41                                         | 0.35×0.19×0.15                                                                | 0.43×0.27×0.25                                                                |
| θ range, [deg]                                     | 1-27.5                                                 | 1-27.5                                                                        | 1-27                                                                          |
| <i>T<sub>min</sub></i> , <i>T<sub>max</sub></i>    | 0.4836, 0.7455                                         | 0.764, 0.880                                                                  | 0.736, 0.830                                                                  |
| no. of reflns measd                                | 89 593                                                 | 61 097                                                                        | 54 633                                                                        |
| no. of unique reflns, <i>R<sub>int</sub></i>       | 12206, 0.103                                           | 12060, 0.081                                                                  | 11084, 0.056                                                                  |
| no. of obsd reflns                                 | 8277                                                   | 7887                                                                          | 8035                                                                          |
| no. of params                                      | 611                                                    | 595                                                                           | 559                                                                           |
| <i>S</i> all data                                  | 1.044                                                  | 1.093                                                                         | 1.106                                                                         |
| final <i>R</i> indices [ <i>I</i> >2σ( <i>I</i> )] | 0.084                                                  | 0.068                                                                         | 0.046                                                                         |
| w <i>R</i> 2 indices (all data)                    | 0.23                                                   | 0.121                                                                         | 0.086                                                                         |
| Δρ, max., min. [e Å <sup>-3</sup> ]                | 1.407, -1.721                                          | 3.109, -2.445                                                                 | 0.795, -0.606                                                                 |
| Diffractometer                                     | Bruker Nonius KappaCCD<br>area detector                | Bruker Nonius KappaCCD<br>area detector                                       | Bruker Nonius KappaCCD<br>area detector                                       |
| Absorption correction                              | Integration<br>Gaussian integration<br>(Coppens, 1970) | Integration<br>Gaussian integration<br>(Coppens, 1970)                        | Integration<br>Gaussian integration<br>(Coppens, 1970)                        |

Definitions:  $R_{\text{int}} = \sum |F_o^2 - F_{o,\text{mean}}^2| / \sum F_o^2$ ,  $S = [\sum (w(F_o^2 - F_c^2)^2) / (N_{\text{diffrs}} - N_{\text{params}})]^{1/2}$  for all data,  $R(F) = \sum ||F_o| - |F_c|| / \sum |F_o|$  for observed data,  $wR(F^2) = [\sum (w(F_o^2 - F_c^2)^2) / (\sum w(F_o^2)^2)]^{1/2}$  for all data.
